# Supplementary material
Source: PubMed Central journal article supplement (PMC9469510)

# EMPA-HEART trial

## CONSORT 2010 Flow Diagram

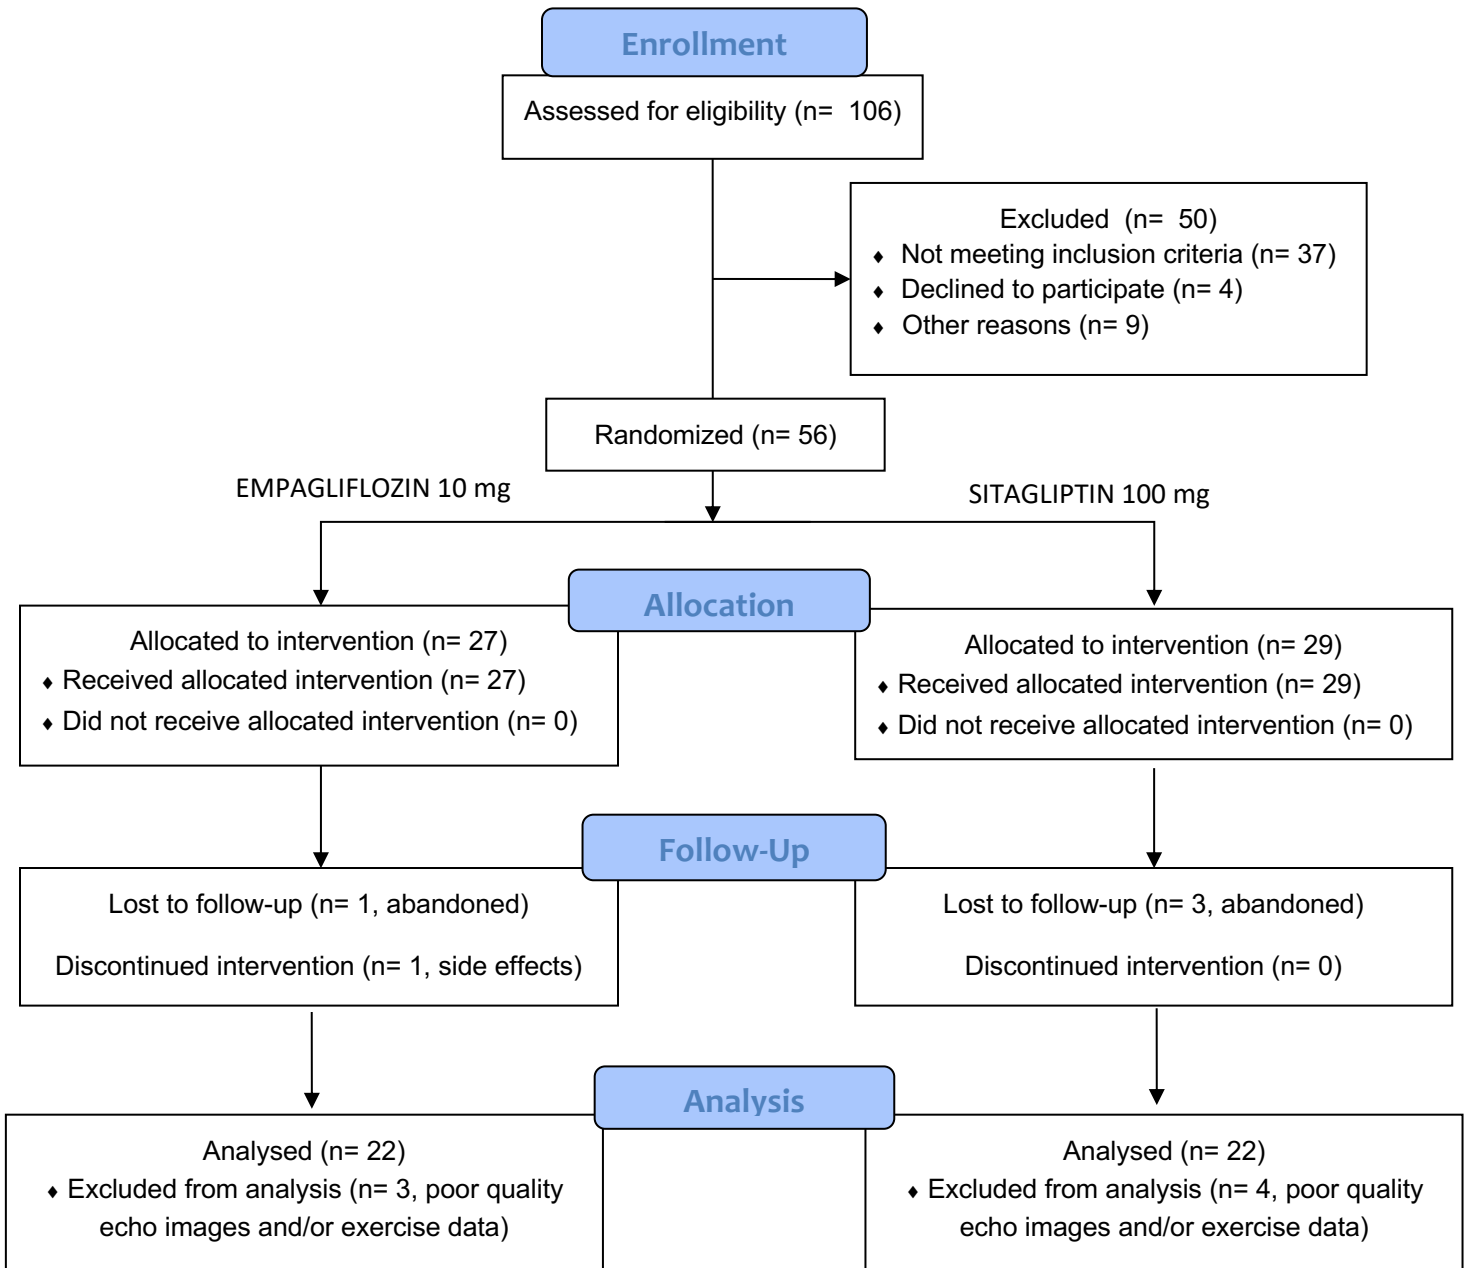

Supplement: 12933_2022_1618_MOESM1_ESM.pdf [file 12933_2022_1618_MOESM1_ESM.pdf]
